# Supplementary material for: Near-infrared light-mediated and nitric oxide-supplied nanospheres for enhanced synergistic thermo-chemotherapy
Source: Royal Society of Chemistry journal article supplement (doi:10.1039/c8tb02939c), 2018-12-13
Supplement: c8tb02939c1.pdf [file c8tb02939c1.pdf]

## Supporting Information

### *Near-Infrared Light-Mediated and Nitric Oxide-Supplied Nanospheres for the Enhanced Synergistic Thermo-chemotherapy*

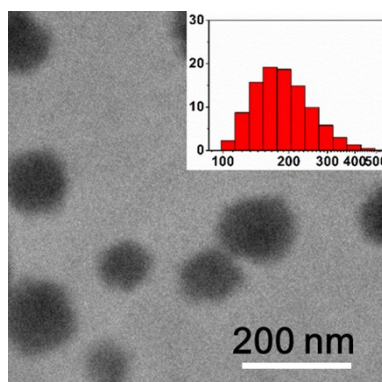

**Figure S1.** TEM and DLS of blank PNIPAM-SS-AMPS nanospheres.

| wt%  | AMPS (g) | NIPAM (g) | BAC (mg) | D <sub>DLS</sub> (nm) |
|------|----------|-----------|----------|-----------------------|
| 0%   | 0        | 2         | 79       | 513.5                 |
| 2.5% | 0.0876   | 1.9124    | 79       | 208.0                 |
| 5%   | 0.1678   | 1.8322    | 79       | 164.5                 |
| 7.5% | 0.2586   | 1.7415    | 79       | 137.2                 |
| 10%  | 0.31     | 1.69      | 79       | 131.6                 |

**Table S1.** Feed ratio and DLS size of nanospheres

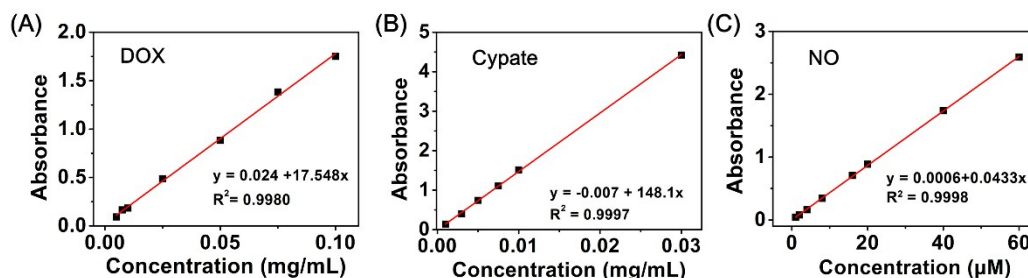

**Figure S2.** Standard working curve of DOX, Cypate and NO.

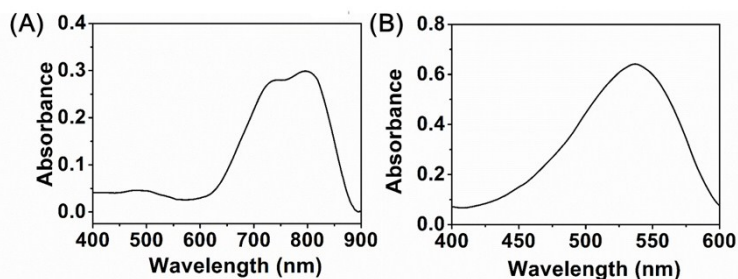

**Figure S3.** UV-vis spectra of drug loading efficiency (A), DOX and Cypate. (B) SNAP in Griess reagent system after removing DOX and nanospheres.

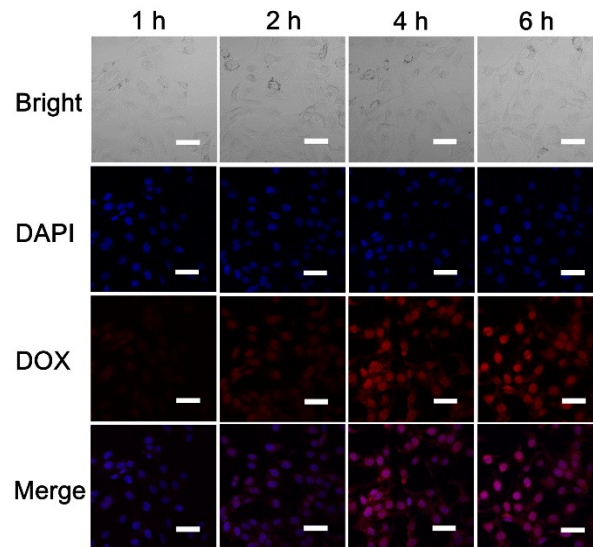

**Figure S4.** CLSM images of MCF-7/ADR cells after incubation with SDCN for 1 h, 2 h, 4 h and 6 h. DOX exhibited red fluorescence and DAPI staining the nucleus showed blue fluorescence. The scale bars correspond to 50  $\mu\text{m}$  in all the images.

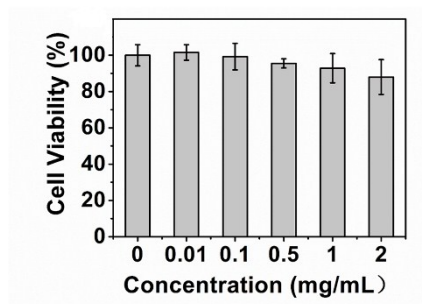

**Figure S5.** Relative viability of MCF-7/ADR cells incubated with different concentrations of blank NS in 24 h.
